# Supplementary material for: In Situ Patrolling of Regulatory T Cells Is Essential for Protecting Autoimmune Exocrinopathy
Source: PubMed Central journal article supplement (PMC2798967; doi:10.1371/journal.pone.0008588), 2010-01-05

Figure S2

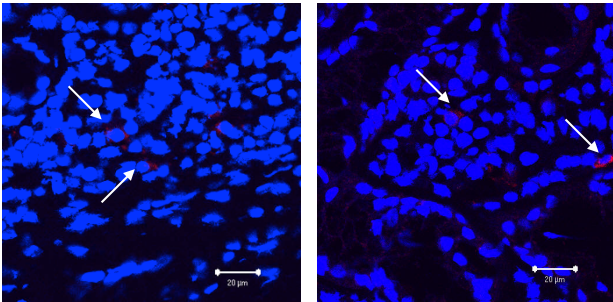

Supplement: pone.0008588.s002.pdf [file pone.0008588.s002.pdf]
